# Supplementary material
Source: PubMed Central journal article supplement (PMC9249553)
Supplement: mmc1.pdf [file mmc1.pdf]

**Table S1.** Search keywords used for literature search

---

**Journal Databases Keyword Strategy**

Search Keywords

---

**1) Generic Exposure of Interest – social media**

“social media” [tiab] OR “social network\*”[tiab] OR “Facebook”[tiab] OR “Twitter”[tiab] OR “linked in” [tiab] OR “linkedin” [tiab] OR “YouTube”[tiab] OR “Instagram”[tiab] OR “Pinterest” [tiab] OR “Snapchat” [tiab] OR “Tumblr” [tiab] OR “MySpace” [tiab] OR “tiktok” [tiab] OR “tik tok” [tiab]

AND

**2) Outcome of Interest - vaccination**

“vaccination” [mesh] OR “vaccin\*”[tiab] OR “immunizati\*”[tiab] OR “immunisati\*”[tiab]

AND

**3) Outcome of Interest – COVID-19**

(COVID-19 [mh] OR 2019 novel coronavirus disease[tiab] OR COVID19[tiab] OR sarscov 2 infection[tiab] OR 2019 novel coronavirus infection[ti] OR 2019 ncov infection[tiab] OR 2019 ncov disease[tiab])

---

**Table S2.** Inclusion and exclusion criteria used when conducting the literature review

|                                      | <b>Inclusion</b>                                                                                                                                                                                                                                | <b>Exclusion</b>                                                                                                                                 |
|--------------------------------------|-------------------------------------------------------------------------------------------------------------------------------------------------------------------------------------------------------------------------------------------------|--------------------------------------------------------------------------------------------------------------------------------------------------|
| <b>Patient population</b>            | Any patient population                                                                                                                                                                                                                          | None                                                                                                                                             |
| <b>Intervention &amp; Comparator</b> | No intervention and no comparator required. If identified, we will include studies that used social media platforms as an intervention to address vaccination intentions.                                                                       |                                                                                                                                                  |
| <b>Outcomes</b>                      | Any outcome related to COVID-19 vaccine (attitudes, opinion, etc) gathered from the social media platforms. Studies that analyzed the relation between the utilization of social media and COVID-19 hesitancy/acceptance will also be included. | Studies that reported no outcome of interest or analyzed data from sources other than social media (websites, newspapers, etc) will be excluded. |
| <b>Study Design</b>                  | Studies of any design will be included.                                                                                                                                                                                                         | None                                                                                                                                             |
| <b>Limits</b>                        | English language only                                                                                                                                                                                                                           |                                                                                                                                                  |
| <b>Timespan</b>                      | From inception until March 2022                                                                                                                                                                                                                 |                                                                                                                                                  |

**Table S3.** Results of study quality appraisal of the included studies.

| Study                     | Total Score | Selection                        |             |                 | Comparability              | Outcome                      |                       |
|---------------------------|-------------|----------------------------------|-------------|-----------------|----------------------------|------------------------------|-----------------------|
|                           |             | Representativeness of the sample | Sample size | Non-respondents | Ascertainments of exposure | Based on design and analysis | Assessment of Outcome |
| Alfatease et al., 2021    | 6           | *                                | *           |                 | *                          | *                            | *                     |
| Allington et al., 2021    | 7           | *                                | *           |                 | *                          | **                           | *                     |
| Allington et al., 2021    | 8           | *                                | *           |                 | **                         | *                            | **                    |
| Al-Hasan et al., 2021     | 7           | *                                | *           |                 | *                          | **                           | *                     |
| Alley et al., 2021        | 5           | *                                |             |                 | *                          | *                            | *                     |
| Aloweidi et al., 2021     | 9           | *                                | *           | *               | **                         | *                            | **                    |
| Al-Marshoudi et al., 2021 | 7           | *                                | *           | *               | *                          | *                            | *                     |
| Al-Mulla et al., 2021     | 5           | *                                |             |                 | *                          | *                            | *                     |
| Al-Wutayd et al., 2021    | 5           |                                  | *           |                 | *                          | *                            | *                     |
| Barry et al., 2021        | 9           | *                                | *           | *               | **                         | *                            | **                    |
| Berenson et al., 2021     | 7           | *                                | *           |                 | **                         |                              | **                    |
| Brailovskaia et al., 2021 | 6           | *                                |             |                 | *                          | **                           | *                     |
| Burger et al., 2022       | 6           | *                                | *           |                 | *                          | *                            | *                     |
| Citu et al., 2022         | 6           | *                                |             |                 | *                          | **                           | *                     |

|                             |   |   |   |   |    |    |    |   |
|-----------------------------|---|---|---|---|----|----|----|---|
| Coughenour et al., 2021     | 7 | * | * |   | *  | ** | *  | * |
| Cui et al., 2022            | 6 | * | * |   | *  | *  | *  | * |
| Dambadarjaa et al., 2021    | 7 | * | * |   | *  | ** | *  | * |
| Ezati Rad et al., 2022      | 4 |   |   |   | *  | *  | *  | * |
| Fazel et al., 2021          | 5 |   |   |   | *  | ** | *  | * |
| Fontenot et al., 2021       | 8 | * | * | * | *  | ** | *  | * |
| Gewirtz-Meydan et al., 2022 | 6 | * |   |   | *  | ** | *  | * |
| Ghaddar et al., 2022        | 4 |   |   |   | *  | *  | *  | * |
| Ghaffari-Rafi et al., 2021  | 5 | * |   |   | *  | *  | *  | * |
| Hatton et al., 2021         | 6 | * | * |   | *  | *  | *  | * |
| Hou et al., 2021            | 5 |   |   |   | *  | ** | *  | * |
| Horiuchi et al., 2021       | 4 |   |   |   | *  | *  | *  | * |
| Jabbour et al., 2022        | 6 | * |   |   | *  | ** | *  | * |
| Jafar et al., 2022          | 7 | * | * |   | *  | ** | *  | * |
| Jain et al., 2021           | 7 | * | * |   | *  | ** | *  | * |
| Jennings et al., 2021       | 8 | * | * |   | ** | *  | ** | * |
| Karabela et al., 2021       | 5 | * |   |   | *  | *  | *  | * |

|                              |    |   |   |   |  |    |    |    |   |
|------------------------------|----|---|---|---|--|----|----|----|---|
| Lee & You, 2021              | 5  | * |   |   |  | *  | *  | *  | * |
| Luo et al., 2021             | 10 | * | * | * |  | ** | ** | ** | * |
| Marinos et al., 2021         | 4  |   |   |   |  | *  | *  | *  | * |
| Mascherin & Nivakoski, 20022 | 7  | * | * |   |  | *  | ** | *  | * |
| Mir et al., 2021             | 7  | * | * |   |  | *  | ** | *  | * |
| Mo et al., 2021              |    |   |   |   |  |    |    |    |   |
| Mose et al., 2022            | 5  | * |   |   |  | *  | *  | *  | * |
| Ouyang et al., 2022          | 5  |   |   |   |  | *  | ** | *  | * |
| Othman et al., 2022          | 6  | * | * |   |  | *  | *  | *  | * |
| Park et al., 2021            | 9  | * | * |   |  | ** | ** | ** | * |
| Piltch-Loeb et al., 2021     | 6  | * | * |   |  | *  | *  | *  | * |
| Qiao et al., 2020            | 8  | * | * | * |  | ** | *  | ** |   |
| Reno et al., 2021            | 4  |   |   |   |  | *  | *  | *  | * |
| Riad et al., 2020            | 6  | * | * |   |  | *  | *  | *  | * |
| Riad et al., 2021            | 8  | * | * | * |  | *  | ** | *  | * |
| Riad et al., 2021            | 8  | * | * | * |  | ** | *  | ** |   |
| Romer and Jamieson, 2021     | 9  | * | * | * |  | ** | *  | ** | * |

|                                |    |   |   |   |    |    |    |    |
|--------------------------------|----|---|---|---|----|----|----|----|
| Ruiz and Bell, 2021            | 8  | * | * |   | ** | *  | ** | *  |
| Sallam et al., 2021            | 9  | * | * |   | ** | ** | ** | *  |
| Šiđanin et al., 2021           | 7  | * | * |   | *  | ** | *  | *  |
| Silva et al., 2022             | 6  | * | * |   | *  | *  | *  | *  |
| Singh et al., 2021             | 4  |   |   |   | *  | *  | *  | *  |
| Sirikalyanpaiboon et al., 2021 | 6  | * |   |   | *  | ** | *  | *  |
| Strathdee, et al., 2021        | 5  | * |   |   | *  | *  | *  | *  |
| Tan et al., 2022               | 8  | * | * | * | *  | ** | *  | *  |
| Wang et al., 2021              | 8  | * | * | * | *  | ** | *  | 0* |
| Xin et al., 2021               | 6  | * | * |   | *  | *  | *  | *  |
| Zhang et al., 2020             | 7  | * | * | * | *  | *  | *  | *  |
| Zhang et al., 2021             | 10 | * | * | * | ** | ** | ** | *  |
| Zimand-Sheiner et al., 2021    | 6  | * |   |   | *  | ** | *  | *  |
